# Supplementary material for: Metabolic risk factors and the incidence and progression of radiographic hand osteoarthritis: a population-based cohort study
Source: PubMed Central journal article supplement (PMC6319183; doi:10.1080/03009742.2018.1459831), 2018-06-28
Supplement: IRHE_A_1459831_SM8242.pdf [file IRHE_A_1459831_SM8242.pdf]

**Supplementary table S1. Variables included in the multiple imputation model**

| Concept                                               | Measurement                                                                                          | Baseline | 7-years   | Included in subsequent analysis |
|-------------------------------------------------------|------------------------------------------------------------------------------------------------------|----------|-----------|---------------------------------|
| Descriptive & sociodemographic                        | Sex (Female, Males)                                                                                  | •        |           | •                               |
|                                                       | Age (years)                                                                                          | •        |           | •                               |
|                                                       | Cohort (CASHA, CASK)                                                                                 | •        |           | •                               |
|                                                       | Follow-up time (months)                                                                              |          | •         | •                               |
|                                                       | Smoking status (Never, Ex, Current)                                                                  | I = 0.3% |           | •                               |
|                                                       | Index of Multiple Deprivation                                                                        | I = 0.3% |           | •                               |
|                                                       | Further education (Yes, No)                                                                          | •        |           |                                 |
|                                                       | Socioeconomic status <sup>(Office for National Statistics 2000)</sup>                                | •        |           |                                 |
| Metabolic factors (2 years before and after baseline) | BMI                                                                                                  | I = 0.3% |           | •                               |
|                                                       | Hypertension (Present, Absent)                                                                       | I = 6.5% |           | •                               |
|                                                       | Diabetes type 2 or impaired fasting glucose (Present, Absent)                                        | I = 6.5% |           | •                               |
|                                                       | Dyslipidaemia (Present, Absent)                                                                      | I = 6.5% |           | •                               |
|                                                       | No. metabolic factors (0-4)                                                                          | I = 6.5% |           | •                               |
|                                                       | Metabolic Syndrome (Present, Absent) †                                                               | I = 6.5% |           | •                               |
|                                                       | No. days statins prescribed                                                                          | I = 6.5% |           |                                 |
| Radiographic OA                                       | KLsum score (0-80)                                                                                   | •        | I = 45.0% | •                               |
|                                                       | No. joints with OA (KL $\geq$ 2) (0-20)                                                              | •        | I = 45.0% | •                               |
| Hand characteristics and symptoms                     | Hand problem in the past 12 months (Yes, No)                                                         | •        | •         |                                 |
|                                                       | Hand pain in the past 12 months (Yes, No)                                                            | •        | •         |                                 |
|                                                       | Side of pain in past 12 months (Right, Left, Both)                                                   | •        | •         |                                 |
|                                                       | Duration of hand problem (months)                                                                    | •        |           |                                 |
|                                                       | Duration of pain in past 12 months (<7 days, 1-4 weeks, 1-3 months, >3 months)                       | •        | •         |                                 |
|                                                       | Frequency of pain in past 1 month (no, few, some, most, all days)                                    | •        | •         |                                 |
|                                                       | AUSCAN pain, function & stiffness subscales <sup>(Bellamy 2002)</sup> (0-20; 0-36; 0-4 respectively) | •        | •         |                                 |
|                                                       | Thumb base OA (Present, Absent)                                                                      | •        | •         | •                               |
|                                                       | Nodal OA (Present, Absent)                                                                           | •        | •         | •                               |
|                                                       | Generalised OA (Present, Absent)                                                                     | •        | •         | •                               |
| General, physical and mental health                   | SF12 physical and mental component scores <sup>(Ware 1996)</sup> (0-100 each)                        | •        |           |                                 |
|                                                       | SF36 physical functioning scale <sup>(Ware &amp; Sherborne 1992)</sup> (0-100)                       | •        |           |                                 |
|                                                       | HADS anxiety and depression subscales <sup>(Zigmond &amp; Snaith 1983)</sup> (0-21 each)             | •        |           |                                 |
| Self-reported comorbidities and health problems       | Raised blood pressure (Present, Absent)                                                              | •        |           |                                 |
|                                                       | Diabetes (Present, Absent)                                                                           | •        |           |                                 |
|                                                       | Chest problems (Present, Absent)                                                                     | •        |           |                                 |
|                                                       | Heart problems (Present, Absent)                                                                     | •        |           |                                 |
|                                                       | Deafness (Present, Absent)                                                                           | •        |           |                                 |
|                                                       | Problems with eyesight (Present, Absent)                                                             | •        |           |                                 |
|                                                       | A fall or falls (Present, Absent)                                                                    | •        |           |                                 |
|                                                       | Difficulty remembering things (Present, Absent)                                                      | •        |           |                                 |
|                                                       | Cough with spit (Present, Absent)                                                                    | •        |           |                                 |
|                                                       | Breathless when walking (Present, Absent)                                                            | •        |           |                                 |
|                                                       | Dizziness or unsteadiness (Present, Absent)                                                          | •        |           |                                 |
| Weakness in an arm or leg (Present, Absent)           | •                                                                                                    |          |           |                                 |

BMI, Body Mass Index; KL, Kellgren Lawrence; AUSCAN, Australian-Canadian Hand Osteoarthritis Index; SF12, Short Form 12; HADS, Hospital Anxiety and Depression Scale; SF36, Short Form 36; I, Data that was imputed and the proportion. † Metabolic Syndrome = Any three of BMI $\geq$ 30kg/m<sup>2</sup>, diabetes type 2/IFG, hypertension, dyslipidaemia. Thumb base OA = KL $\geq$ 2 in the 1CMCJ in either hand; Nodal IPJ OA = KL $\geq$ 2 in  $\geq$ 2 IPJs (rays 2-5) &  $\geq$ 2 nodes (rays 2-3) across either hand; Generalised hand OA = KL $\geq$ 2 in  $\geq$ 1 distal IPJ &  $\geq$ 1 proximal IPJ &  $\geq$ 1 1CMCJ across either hand; Erosive OA = E or R phase in  $\geq$ 2 IPJ (rays 2-5) across either hand.

References: Bellamy N, et al. Dimensionality and clinical importance of pain and disability in hand osteoarthritis: Development of the Australian/Canadian (AUSCAN) Osteoarthritis Hand Index. *Osteoarthritis Cartilage* 2002;10:855-62. Office for National Statistics (ONS). The National Statistics Socioeconomic Classification User Manual (version 1). London: Office for National Statistics. 2002. Ware J Jr, et al. A 12-Item Short-Form Health Survey: construction of scales and preliminary tests of reliability and validity. *Med Care* 1996;34:220-33. Ware JE Jr, Sherbourne CD. The MOS 36-item Short-Form health survey (SF-36). I. Conceptual framework and item selection. *Med Care*. 1992;30:473-83. Zigmond AS, Snaith RP. The hospital anxiety and depression scale. *Acta Psychiatr Scand* 1983;67:361-70.

**Supplementary figure S1. Scatter plots showing the relation between baseline and 7-year radiographic scores, stratified by sex in the complete case analysis (n = 388)**

**Females**

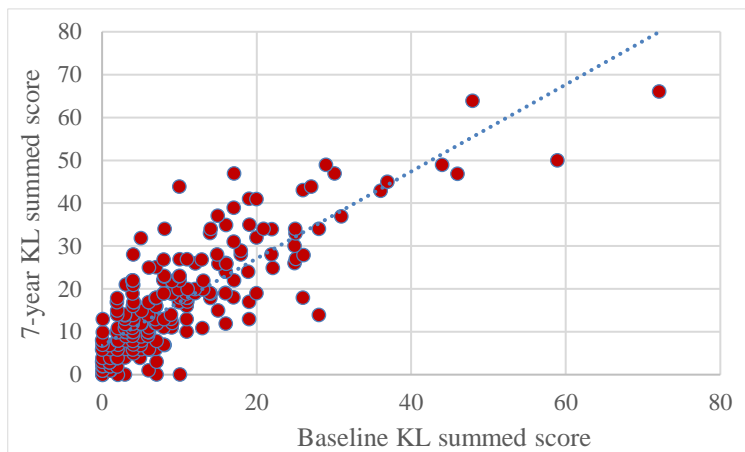

**Males**

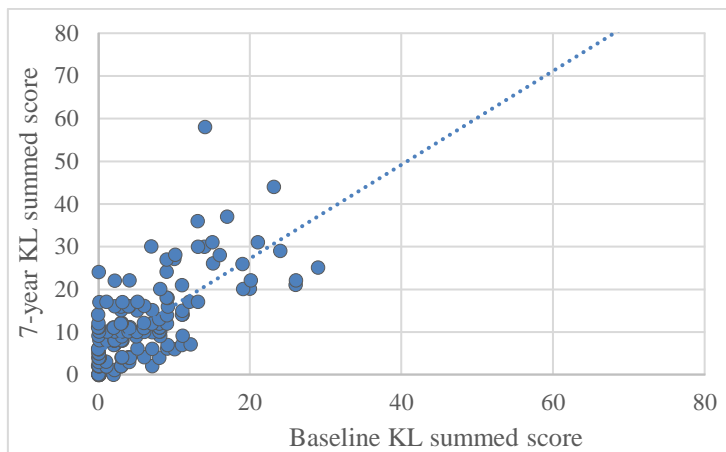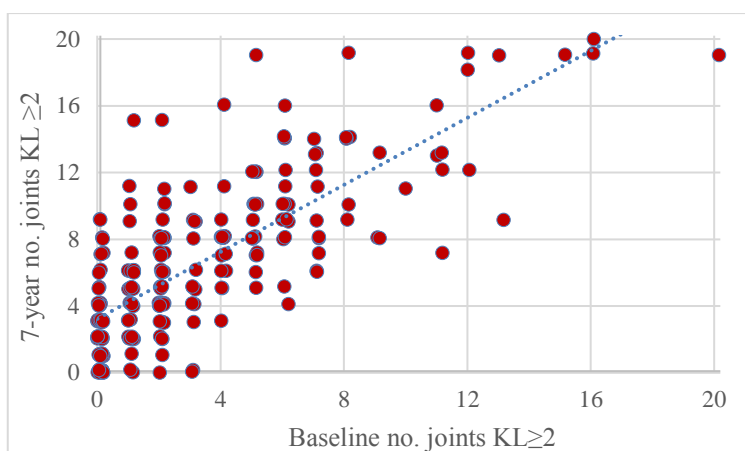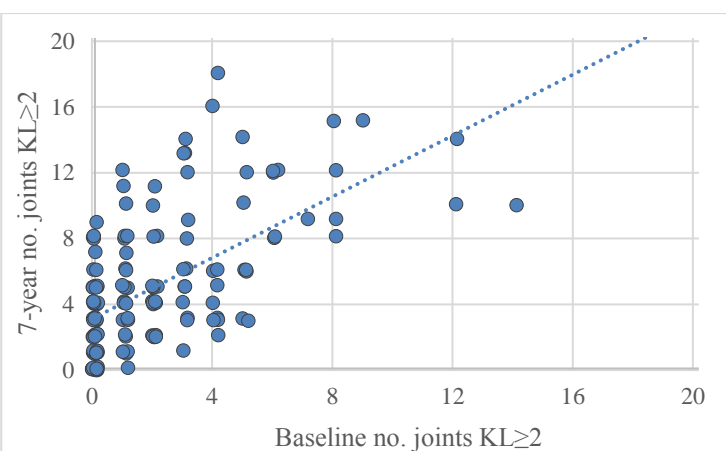

*KL, Kellgren Lawrence. Jittering has been used to allow better visualisation of overlapping markers.*

**Supplementary table S2. The amount of radiographic change at 7-years overall, for those free of radiographic OA at baseline, and also separately for baseline hand OA subsets, stratified by sex in the complete case analysis**

|                                                                                | Females |                |              | Males |                |              |
|--------------------------------------------------------------------------------|---------|----------------|--------------|-------|----------------|--------------|
| Outcome = Kellgren-Lawrence summed score (0-80)                                |         |                |              |       |                |              |
|                                                                                | n       | Adjusted mean* | (95%CI)      | n     | Adjusted mean* | (95%CI)      |
| Total                                                                          | 233     | 16.5           | (15.5, 17.5) | 155   | 11.1           | (10.0, 12.1) |
| No baseline hand OA                                                            | 62      | 5.6            | (4.1, 7.2)   | 64    | 4.0            | (2.5, 5.6)   |
| Thumb base OA                                                                  | 115     | 21.3           | (19.9, 22.8) | 54    | 16.1           | (13.4, 18.9) |
| Nodal IPJ OA                                                                   | 62      | 27.9           | (24.2, 31.6) | 23    | 20.7           | (15.9, 25.5) |
| Generalised hand OA                                                            | 32      | 33.0           | (28.5, 37.5) | 13    | 27.2           | (14.9, 39.4) |
| Erosive OA                                                                     | 10      | 42.8           | (38.3, 47.3) | 1     | -              | -            |
| Outcome = Number of hand joints with Kellgren-Lawrence Grade $\geq$ 2 (0-20) † |         |                |              |       |                |              |
|                                                                                | n       | Adjusted mean* | (95%CI)      | n     | Adjusted mean* | (95%CI)      |
| Total                                                                          | 232     | 6.5            | (6.1, 6.9)   | 155   | 4.8            | (4.3, 5.2)   |
| No baseline hand OA                                                            | 62      | 2.4            | (1.7, 3.0)   | 64    | 1.7            | (1.0, 2.5)   |
| Thumb base OA                                                                  | 114     | 8.4            | (7.8, 8.9)   | 52    | 6.8            | (5.8, 7.7)   |
| Nodal IPJ OA                                                                   | 61      | 11.1           | (9.9, 12.3)  | 23    | 9.2            | (7.3, 11.1)  |
| Generalised hand OA                                                            | 31      | 12.7           | (11.2, 14.1) | 13    | 11.0           | (7.7, 14.4)  |
| Erosive OA                                                                     | 9       | 13.3           | (11.5, 15.0) | 1     | -              | -            |

95% CI, 95% Confidence interval; \* adjusted for baseline value of outcome measure, cohort, age, time to follow-up; † One individual excluded due to maximum number of joints affected at baseline (n=20). No hand OA = KL<2 in all hand joints; Nodal IPJ OA = KL $\geq$ 2 in  $\geq$ 2 IPJs (rays 2-5) &  $\geq$ 2 nodes (rays 2-3) across either hand; Thumb base OA = KL $\geq$ 2 in the 1CMCJ in either hand; Generalised hand OA = KL $\geq$ 2 in  $\geq$ 1 distal IPJ &  $\geq$ 1 proximal IPJ &  $\geq$ 1 1CMCJ across either hand; Erosive OA =  $\geq$ 2 IPJ (rays 2-5) across either hand.
